# Supplementary material for: Use of Cardiac Procedures in People with Diabetes during the COVID Pandemic in Spain: Effects on the In-Hospital Mortality
Source: MDPI journal article supplement (doi:10.3390/ijerph20010844), 2023-01-02
Supplement: s1 [file s1]

**Figure S1.** Use of cardiac procedures among people with diabetes by months for years 2019 and 2020.

**A. Coronary artery bypass graft (CABG)**

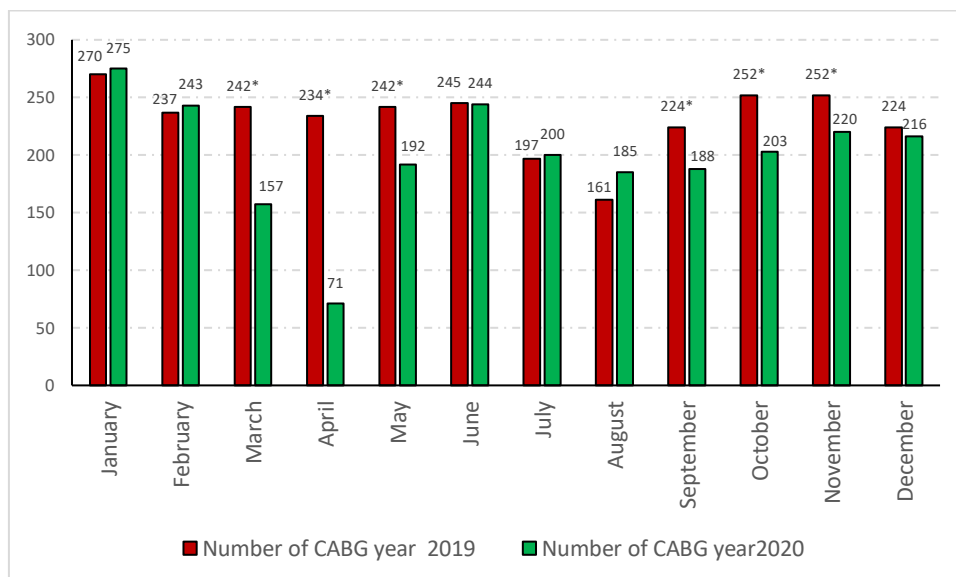

\* Significant change that month

**B. Percutaneous coronary intervention (PCI)**

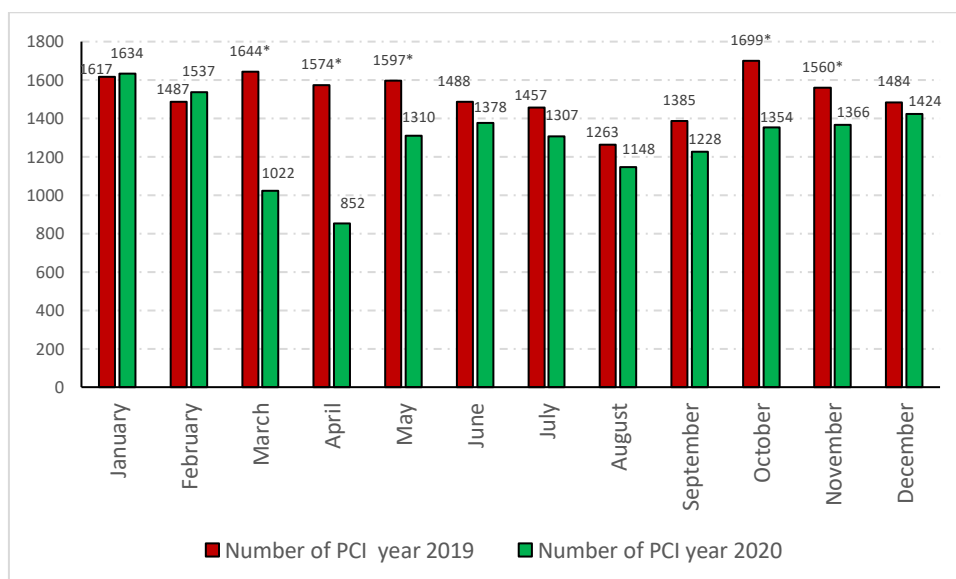

\* Significant change that month

### C. Open surgical aortic or mitral or tricuspid or pulmonary valve replacement (OSVR)

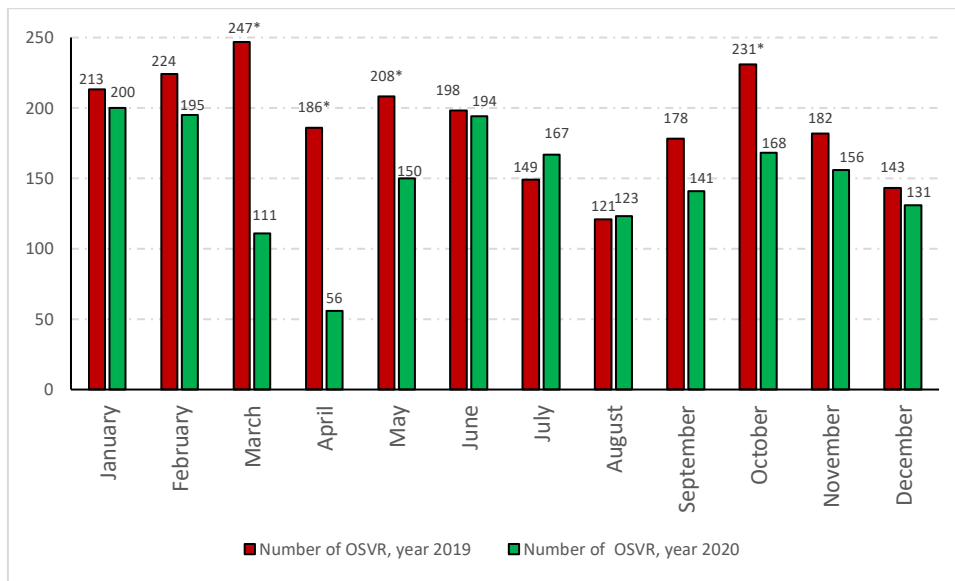

\* Significant change that month

### D. Trans-catheter aortic or mitral or tricuspid or pulmonary valve implantation (TCVI)

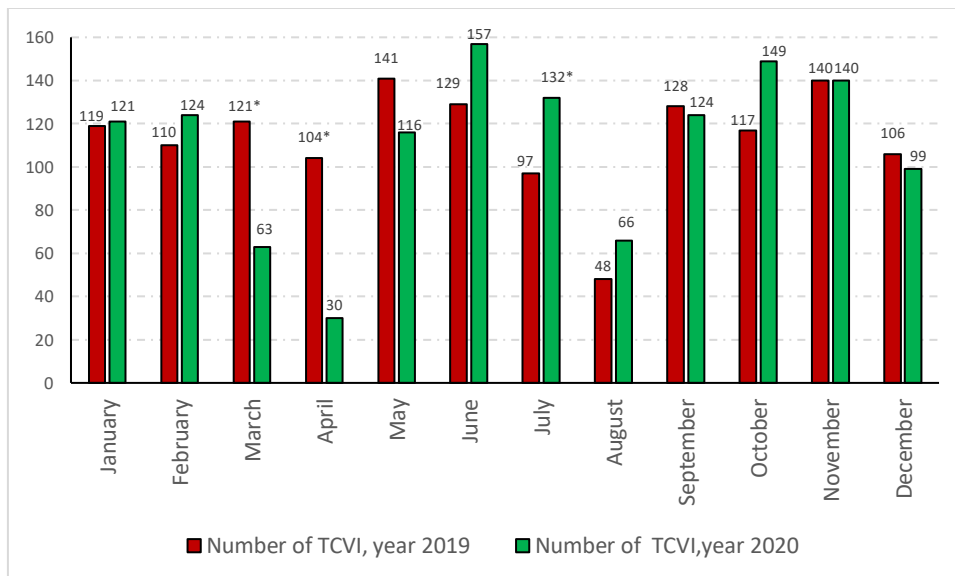

\* Significant change that month

**Table S1. International Classification of Disease, 10th edition, (ICD-10) codes for the clinical diagnoses and procedures used in this investigation.**

| <b>PROCEDURES</b>                   | <b>ICD-10 codes</b>                                                                       |
|-------------------------------------|-------------------------------------------------------------------------------------------|
| Percutaneous coronary intervention. | 02703XX, 02704xx, 02713XX, 02714xx, 02723XX, 02724xx, 02733XX, 02734xx                    |
| Coronary artery bypass graft        | 02100XX, 02110XX, 02120XX, 02130XX                                                        |
| Open heart valve replacement        | 02RF0XX, 02RG0XX, 02RH0XX, 02RJ0XX                                                        |
| Trans-catheter valve implantation   | 02RF3xx; 02RG3xx; 02RH3xx; 02RJ3xx                                                        |
| Non-invasive mechanical ventilation | 5A09357, 5A09457, 5A09557                                                                 |
| Invasive mechanical ventilation     | 5A1945Z, 5A1955Z, 5A1935Z                                                                 |
| Dialysis                            | 5A1D xxx                                                                                  |
| <b>DIAGNOSIS</b>                    | <b>ICD-10 codes</b>                                                                       |
| Diabetes                            | E10.xxx ,E11.xxx                                                                          |
| Peripheral vascular disease         | I70.x, I71.x, I73.1, I73.8, I73.9, I77.1, I79.0, I79.2, K55.1, K55.8, K55.9, Z95.8, Z95.9 |
| Ischemic heart disease              | I20-I25                                                                                   |
| Valvular heart disease              | I05-I08, I33-I39                                                                          |
| Atrial fibrillation                 | I48.0, I48.1, I48.2, I48.91                                                               |
| Heart failure                       | I09.9, I11.0, I13.0, I13.2, I25.5, I42.0, I42.5–I42.9, I43.x, I50.x, P29.0                |
| Chronic kidney disease              | N18                                                                                       |
| COVID 19                            | B34.2, B97.29, U07.1                                                                      |

**Table S2. Multivariable Logistic regression models to assess the change from 2019 to 2020 in the in-hospital mortality among people with diabetes according to cardiac procedures**

|                                         | Coronary artery<br>bypass graft | Percutaneous coronary<br>intervention. | Open Heart valve<br>replacement | Trans-catheter valve<br>implantation |
|-----------------------------------------|---------------------------------|----------------------------------------|---------------------------------|--------------------------------------|
| Man                                     | 1                               | 1                                      | 1                               | 1                                    |
| Women                                   | 1.94(1.41-2.66)                 | 1.19(1.05-1.35)                        | 1.79(1.38-2.32)                 | 1.2(0.76-1.88)                       |
| Age (Continuous)                        | 1.04 (1.01-1.07)                | 1.02 (1.00-1.04)                       | 1.05 (1.02-1.08)                | 1.03 (1.00-1.07)                     |
| Charlson comorbidity index (Continuous) | 1.45(1.35-1.55)                 | 1.32(1.28-1.36)                        | 1.36(1.27-1.47)                 | 1.26(1.12-1.42)                      |
| 2019                                    | 1                               | 1                                      | 1                               | 1                                    |
| 2020                                    | 1.01(0.76-1.35)                 | 1.07(0.95-1.2)                         | 1.06(0.82-1.37)                 | 1.02(0.65-1.58)                      |

**Table S3. Characteristics of patients with diabetes who underwent a coronary artery bypass graft (CABG), percutaneous coronary intervention (PCI), open surgical valve replacement (OSVR), and transcatheter valve implantation (TCVI) from 2017 to 2019 in Spain. Analysis of the Spanish National Hospital Discharge Database.**

|             |                      | <b>2017</b>  | <b>2018</b>  | <b>2019</b>  | <b>p for trend</b> |
|-------------|----------------------|--------------|--------------|--------------|--------------------|
| <b>CABG</b> | N                    | 2789         | 2773         | 2780         | 0.325              |
|             | Men n (%)            | 2198(78.81)  | 2205(79.52)  | 2246(80.79)  | 0.185              |
|             | Women n (%)          | 591(21.19)   | 568(20.48)   | 534(19.21)   |                    |
|             | Age. mean (SD)       | 68.12(8.8)   | 68.02(8.82)  | 67.74(8.52)  | 0.226              |
|             | CCI index. mean (SD) | 2.34(1.39)   | 2.44(1.5)    | 2.49(1.51)   | <0.081             |
| <b>PCI</b>  | N                    | 16437        | 17422        | 18255        | <0.001             |
|             | Men n (%)            | 12050(73.31) | 12934(74.24) | 13421(73.52) | 0.335              |
|             | Women n (%)          | 4387(26.69)  | 4488(25.76)  | 4834(26.48)  |                    |
|             | Age. mean (SD)       | 68.77(10.96) | 68.68(10.97) | 69.26(10.9)  | <0.001             |
|             | CCI index. mean (SD) | 2.61(1.43)   | 2.69(1.54)   | 2.75(1.57)   | <0.011             |
| <b>OSVR</b> | N                    | 2387         | 2312         | 2280         | 0.103              |
|             | Men n (%)            | 1444(60.49)  | 1384(59.86)  | 1421(62.32)  | 0.067              |
|             | Women n (%)          | 943(39.51)   | 928(40.14)   | 859(37.68)   |                    |
|             | Age. mean (SD)       | 71.36(8.11)  | 70.94(7.99)  | 70.44(7.91)  | 0.159              |
|             | CCI index. mean (SD) | 2.18(1.45)   | 2.19 (1.49)  | 2.21(1.43)   | <0.051             |
| <b>TCVI</b> | N                    | 791          | 1100         | 1360         | <0.001             |
|             | Men n (%)            | 410(51.83)   | 574(52.18)   | 716(52.65)   | 0.732              |
|             | Women n (%)          | 381(48.17)   | 526(47.82)   | 644(47.35)   |                    |
|             | Age. mean (SD)       | 79.73(6.61)  | 79.61(6.86)  | 79.64(6.78)  | 0.827              |
|             | CCI index. mean (SD) | 2.64(1.57)   | 2.62(1.61)   | 2.62(1.61)   | 0.091              |

**Table S4. In hospital mortality of patients with diabetes who underwent a coronary artery bypass graft (CABG), percutaneous coronary intervention (PCI), open surgical valve replacement (OSVR), and transcatheter valve implantation (TCVI) from 2017 to 2019 in Spain. Analysis of the Spanish National Hospital Discharge Database.**

|      |                       | 2017      | 2018      | 2019      | 2020      | p for trend |
|------|-----------------------|-----------|-----------|-----------|-----------|-------------|
| CABG | Both sexes, n (%)     | 109(3.91) | 115(4.15) | 106(3.81) | 99(4.14)  | 0.892       |
|      | Men n (%)             | 83(3.78)  | 78(3.54)  | 76(3.38)  | 69(3.55)  | 0.885       |
|      | Women n (%)           | 26(4.4)   | 37(6.51)  | 30(5.62)  | 30(6.7)   | 0.875       |
|      | p for sex-differences | 0.569     | 0.001     | 0.015     | 0.003     | -           |
| PCI  | Both sexes, n (%)     | 518(3.15) | 572(3.28) | 639(3.5)  | 599(3.85) | <0.001      |
|      | Men n (%)             | 350(2.9)  | 387(2.99) | 434(3.23) | 411(3.56) | <0.001      |
|      | Women n (%)           | 168(3.83) | 185(4.12) | 205(4.24) | 188(4.67) | 0.027       |
|      | p for sex-differences | 0.003     | <0.001    | 0.001     | 0.002     | -           |
| OSVR | Both sexes, n (%)     | 160(6.7)  | 157(6.80) | 140(6.14) | 121(6.75) | 0.007       |
|      | Men n (%)             | 91(6.3)   | 75 (5.42) | 67(4.71)  | 69(6.07)  | 0.024       |
|      | Women n (%)           | 69(7.32)  | 71 (7.66) | 73(8.5)   | 52(7.94)  | 0.234       |
|      | p for sex-differences | 0.587     | 0.02      | <0.001    | 0.129     |             |
| TCVI | Both sexes, n (%)     | 23(2.91)  | 36(3.27)  | 40(2.94)  | 42(3.18)  | 0.697       |
|      | Men n (%)             | 11(2.68)  | 15(2.85)  | 18(2.51)  | 17(2.67)  | 0.728       |
|      | Women n (%)           | 12(3.15)  | 21(3.66)  | 22(3.42)  | 25(3.65)  | 0.839       |
|      | p for sex-differences | 0.696     | 0.450     | 0.325     | 0.312     |             |

**Table S5. Multivariable Logistic regression models to assess the change from 2017 to 2020 in the in-hospital mortality among people with diabetes according to cardiac procedures**

|                                         | Coronary artery<br>bypass graft | Percutaneous coronary<br>intervention. | Open Heart valve<br>replacement | Trans-catheter valve<br>implantation |
|-----------------------------------------|---------------------------------|----------------------------------------|---------------------------------|--------------------------------------|
| Man                                     | 1                               | 1                                      | 1                               | 1                                    |
| Women                                   | 1.76(1.45-2.14)                 | 1.2(1.1-1.3)                           | 1.52(1.31-1.76)                 | 1.11(0.8-1.54)                       |
| Age (Continuous)                        | 1.04(1.02-1.05)                 | 1.04(1.03-1.04)                        | 1.02(1.01-1.03)                 | 1.03(1.00-1.06)                      |
| Charlson comorbidity index (Continuous) | 1.44(1.37-1.51)                 | 1.35(1.32-1.38)                        | 1.41(1.35-1.47)                 | 1.29(1.18-1.4)                       |
| 2017                                    | 1                               | 1                                      | 1                               | 1                                    |
| 2016                                    | 0.85(0.64-1.12)                 | 1.05(0.93-1.19)                        | 0.71(0.56-0.89)                 | 0.76(0.44-1.31)                      |
| 2019                                    | 0.87(0.64-1.16)                 | 1.08(0.91-1.23)                        | 0.74(0.58-0.94)                 | 0.76(0.44-1.32)                      |
| 2020                                    | 1.26(0.95-1.86)                 | 1.12(0.97-1.36)                        | 1.22(0.99-1.56)                 | 1.11(0.8-1.54)                       |
